# Supplementary material for: Comprehensive analysis of LRR-RLKs and key gene identification in Pinus massoniana resistant to pine wood nematode
Source: Front Plant Sci. 2022 Dec 14;13:1043261. doi: 10.3389/fpls.2022.1043261 (PMC9795191; doi:10.3389/fpls.2022.1043261)
Supplement: Supplementary file 3 [file Table_2.xlsx]

## Sheet: ST_1_LRR-RKs List
Sequence ID	Gene name	subclade	length	Molecular Weight	Theoretical pI	Instability Index	Aliphatic Index	Grand Average of Hydropathicity	Function class defination	Description	Functional Category	suba3 short
S_transcript/26620	PmRLKs1	receptor kinases	480	53562.3	6.62	36.12	91.38	-0.331	Signal transduction mechanisms	Serine Threonine protein kinase	T	chlo
R_transcript/3078	PmRLKs10	receptor kinases	1069	117519	7.51	38.22	108.33	0.109	Function unknown	leucine Rich Repeat	S	plas
R_transcript/2406	PmRLKs100	receptor kinases	717	79742.4	6.6	40.92	92.04	-0.076	Function unknown	leucine Rich Repeat	S	extr
S_transcript/10466	PmRLKs101	receptor kinases	741	79233.7	8.47	26.66	97.53	0.016	Function unknown	leucine Rich Repeat	S	chlo
S_transcript/1274	PmRLKs102	receptor kinases	1415	154168	5.75	39.43	113.98	0.061	Function unknown	leucine Rich Repeat	S	plas
R_transcript/8465	PmRLKs103	receptor kinases	902	95803.8	5.77	36.68	89.21	-0.035	Signal transduction mechanisms	receptor protein kinase	T	plas
R_transcript/16531	PmRLKs104	receptor kinases	666	73823.6	7.9	45.29	88.15	-0.206	Signal transduction mechanisms	Leucine-rich repeat receptor-like protein kinase	T	plas
S_transcript/9825	PmRLKs105	receptor kinases	1042	114182	8.17	30.7	106.35	0.068	Function unknown	leucine Rich Repeat	S	plas
R_transcript/5122	PmRLKs106	receptor kinases	1058	116285	8.3	36.89	103.35	-0.084	Signal transduction mechanisms	Serine Threonine protein kinase	T	vacu
S_transcript/12681	PmRLKs107	receptor kinases	747	81379.3	7.87	30.35	111.55	0.112	Function unknown	leucine Rich Repeat	S	cyto
R_transcript/3806	PmRLKs108	receptor kinases	946	103260	8.6	33.81	104.79	0.003	Function unknown	leucine Rich Repeat	S	vacu
R_transcript/2118	PmRLKs109	receptor kinases	906	100070	5.92	44.08	98.66	-0.135	Signal transduction mechanisms	LRR receptor-like serine threonine-protein kinase	T	plas
S_transcript/9632	PmRLKs11	receptor kinases	1022	114314	7.72	36.89	93.25	-0.194	Function unknown	leucine Rich Repeat	S	plas
S_transcript/14564	PmRLKs110	receptor kinases	1069	117576	6.99	41.22	109.32	0.105	Function unknown	leucine Rich Repeat	S	chlo
S_transcript/1644	PmRLKs111	receptor kinases	1312	143273	5.23	30.48	111	0.052	Function unknown	leucine Rich Repeat	S	plas
R_transcript/21032	PmRLKs112	receptor kinases	638	70753.7	8.44	37.13	103.42	-0.065	Signal transduction mechanisms	NSP-interacting kinase	T	plas
S_transcript/7824	PmRLKs113	receptor kinases	1104	121217	6.03	37.75	111.25	0.056	Function unknown	leucine Rich Repeat	S	plas
R_transcript/10391	PmRLKs114	receptor kinases	713	78359.9	8.72	33.11	97.25	-0.046	Signal transduction mechanisms	LRR receptor-like serine threonine-protein kinase	T	plas
R_transcript/3946	PmRLKs115	receptor kinases	1158	127779	6.63	38.53	109.35	0.02	Function unknown	leucine Rich Repeat	S	plas
S_transcript/15504	PmRLKs116	receptor kinases	1062	116561	6.28	38.62	109.05	0.025	Function unknown	leucine Rich Repeat	S	plas
S_transcript/4570	PmRLKs117	receptor kinases	1086	120737	6.55	39.17	101.52	-0.041	Function unknown	leucine Rich Repeat	S	chlo
S_transcript/3019	PmRLKs118	receptor kinases	1149	126267	6.39	43.55	110.91	0.059	Function unknown	leucine Rich Repeat	S	plas
S_transcript/11757	PmRLKs119	receptor kinases	1021	112224	8.53	31.79	101.75	-0.02	Function unknown	leucine Rich Repeat	S	plas
S_transcript/23631	PmRLKs12	receptor kinases	699	75573.2	6.09	39.47	89.24	-0.055	Signal transduction mechanisms	inactive leucine-rich repeat receptor-like serine threonine-protein kinase	T	plas
R_transcript/1981	PmRLKs120	receptor kinases	1014	111725	5.68	34.37	105.05	0.007	Function unknown	leucine Rich Repeat	S	plas
S_transcript/5529	PmRLKs121	receptor kinases	1003	109767	8.28	41.23	108.54	0.084	Function unknown	leucine Rich Repeat	S	chlo
S_transcript/6770	PmRLKs122	receptor kinases	1023	111082	6.4	33.81	104.53	0.08	Function unknown	leucine Rich Repeat	S	plas
S_transcript/3316	PmRLKs123	receptor kinases	1189	129837	6.89	40.93	99.69	0.035	Function unknown	leucine Rich Repeat	S	plas
S_transcript/19960	PmRLKs124	receptor kinases	930	103821	5.21	36.2	92.95	-0.138	Signal transduction mechanisms	Serine Threonine protein kinase	T	plas
R_transcript/4587	PmRLKs125	receptor kinases	1058	116227	6.77	38.44	104.66	0.085	Function unknown	leucine Rich Repeat	S	plas
R_transcript/8337	PmRLKs126	receptor kinases	913	99837.9	8.55	38.23	104.24	0.006	Function unknown	leucine Rich Repeat	S	plas
S_transcript/32209	PmRLKs127	receptor kinases	658	71401.6	6.39	46.59	86.41	-0.3	Signal transduction mechanisms	Serine Threonine protein kinase	T	chlo
S_transcript/6406	PmRLKs128	receptor kinases	854	94042.1	7.62	37.82	92.07	-0.107	Function unknown	leucine Rich Repeat	S	nucl
R_transcript/8976	PmRLKs129	receptor kinases	629	69385.7	6.05	40.72	101.03	-0.056	Signal transduction mechanisms	Serine Threonine protein kinase	T	plas
S_transcript/20476	PmRLKs13	receptor kinases	663	72960.9	8.6	44.21	94.86	-0.125	Signal transduction mechanisms	Leucine-rich repeat receptor-like protein kinase	T	extr
S_transcript/4850	PmRLKs130	receptor kinases	950	105430	6.6	43.31	92.69	-0.15	Signal transduction mechanisms	LRR receptor-like serine threonine-protein kinase	T	plas
S_transcript/15856	PmRLKs131	receptor kinases	929	104013	5.75	35.96	92.23	-0.187	Signal transduction mechanisms	Serine Threonine protein kinase	T	plas
S_transcript/13399	PmRLKs132	receptor kinases	967	105994	8.18	38.99	107.64	0.115	Function unknown	leucine Rich Repeat	S	vacu
S_transcript/4534	PmRLKs133	receptor kinases	1108	122038	6.21	39.53	105.67	-0.044	Function unknown	leucine Rich Repeat	S	plas
S_transcript/5811	PmRLKs134	receptor kinases	999	110298	5.22	35.87	99.72	-0.159	Function unknown	leucine Rich Repeat	S	plas
R_transcript/4034	PmRLKs135	receptor kinases	985	107509	6.74	33.22	103.19	-0.011	Function unknown	leucine Rich Repeat	S	vacu
R_transcript/4120	PmRLKs136	receptor kinases	899	99296.8	5.69	39.98	100.21	-0.104	Function unknown	leucine Rich Repeat	S	E.R.
R_transcript/8566	PmRLKs137	receptor kinases	655	72307.7	9.22	43.41	89.42	-0.249	Function unknown	inactive receptor kinase	S	vacu
S_transcript/24154	PmRLKs138	receptor kinases	907	100550	6.67	33.75	114.43	0.124	Function unknown	leucine Rich Repeat	S	plas
R_transcript/20227	PmRLKs139	receptor kinases	626	70026	5.8	42.63	89.7	-0.26	Signal transduction mechanisms	Somatic embryogenesis receptor kinase	T	vacu
S_transcript/5874	PmRLKs14	receptor kinases	977	106494	6.74	33.81	105.83	0.041	Function unknown	leucine Rich Repeat	S	plas
S_transcript/3940	PmRLKs140	receptor kinases	960	103946	5.72	40.51	90.5	-0.076	Signal transduction mechanisms	receptor protein kinase	T	E.R.
S_transcript/5029	PmRLKs141	receptor kinases	1015	111605	5.82	37.17	103.24	-0.018	Function unknown	leucine Rich Repeat	S	plas
S_transcript/10811	PmRLKs142	receptor kinases	1105	121932	7.01	40.1	109.32	0.08	Function unknown	leucine Rich Repeat	S	plas
S_transcript/4187	PmRLKs143	receptor kinases	1133	123003	5.49	33.78	105.68	-0.033	Function unknown	leucine Rich Repeat	S	plas
S_transcript/16421	PmRLKs144	receptor kinases	711	76593.8	8.85	44.83	97.13	-0.088	Function unknown	kinase-like protein	S	vacu
S_transcript/14187	PmRLKs145	receptor kinases	909	99253.5	5.8	43.36	108.88	0.072	Function unknown	leucine Rich Repeat	S	chlo
R_transcript/11619	PmRLKs146	receptor kinases	802	86572.6	8.96	30.64	100.96	-0.074	Function unknown	leucine Rich Repeat	S	nucl
S_transcript/9125	PmRLKs147	receptor kinases	1029	114242	7.07	39.61	96.93	-0.07	Function unknown	leucine Rich Repeat	S	plas
S_transcript/14440	PmRLKs148	receptor kinases	909	100563	7.3	35.3	104.11	0.004	Function unknown	leucine Rich Repeat	S	plas
R_transcript/22212	PmRLKs149	receptor kinases	606	68346.5	6.43	35.96	98.3	-0.207	Signal transduction mechanisms	Serine Threonine protein kinase	T	extr
R_transcript/3629	PmRLKs15	receptor kinases	1008	111765	6.32	33.04	101.37	-0.139	Function unknown	leucine Rich Repeat	S	plas
S_transcript/10107	PmRLKs150	receptor kinases	1081	118218	6.04	38.42	116.13	0.114	Function unknown	leucine Rich Repeat	S	chlo
S_transcript/1664	PmRLKs151	receptor kinases	932	100848	6.54	45.52	103.56	-0.023	Function unknown	LRR receptor-like serine threonine-protein kinase	S	chlo
R_transcript/7401	PmRLKs152	receptor kinases	919	102935	5.39	33.25	93.75	-0.145	Signal transduction mechanisms	Serine Threonine protein kinase	T	chlo
S_transcript/7415	PmRLKs153	receptor kinases	1017	111874	5.5	35.36	108.19	-0.002	Function unknown	leucine Rich Repeat	S	extr
S_transcript/6772	PmRLKs154	receptor kinases	1142	124166	6.57	35.49	106.22	-0.001	Function unknown	leucine Rich Repeat	S	plas
R_transcript/4741	PmRLKs155	receptor kinases	1058	116797	8.41	32.49	106.98	0.077	Function unknown	leucine Rich Repeat	S	vacu
S_transcript/18088	PmRLKs156	receptor kinases	587	65757.8	7.23	33.87	102.42	-0.112	Signal transduction mechanisms	Serine Threonine protein kinase	T	chlo
R_transcript/24485	PmRLKs157	receptor kinases	681	74207.9	6.51	39.06	106.01	0.058	Function unknown	kinase-like protein	S	plas
S_transcript/9496	PmRLKs158	receptor kinases	972	104648	6.38	45.92	105.74	0.087	Function unknown	leucine Rich Repeat	S	extr
S_transcript/10278	PmRLKs159	receptor kinases	915	101521	6.4	31.18	103.67	0	Function unknown	leucine Rich Repeat	S	plas
R_transcript/3928	PmRLKs16	receptor kinases	940	103319	5.94	42.79	103.96	-0.056	Function unknown	leucine Rich Repeat	S	chlo
S_transcript/6400	PmRLKs160	receptor kinases	639	71188.4	8.93	41.35	94.48	-0.133	Signal transduction mechanisms	inactive leucine-rich repeat receptor-like serine threonine-protein kinase	T	plas
S_transcript/6429	PmRLKs161	receptor kinases	1003	110006	5.87	38.6	98.96	-0.117	Function unknown	leucine Rich Repeat	S	plas
S_transcript/5393	PmRLKs162	receptor kinases	1057	117450	6.86	41.62	98.33	-0.106	Function unknown	leucine Rich Repeat	S	chlo
R_transcript/6598	PmRLKs163	receptor kinases	1064	118022	6.98	37.11	104.44	-0.027	Function unknown	leucine Rich Repeat	S	plas
S_transcript/3331	PmRLKs164	receptor kinases	1003	109896	5.74	38.1	100.01	-0.046	Function unknown	leucine Rich Repeat	S	plas
R_transcript/459	PmRLKs165	receptor kinases	1238	133901	5.78	33.49	104.1	0.013	Function unknown	leucine Rich Repeat	S	plas
S_transcript/8955	PmRLKs166	receptor kinases	1106	121245	5.84	36.28	114.69	0.079	Function unknown	leucine Rich Repeat	S	cyto
R_transcript/5014	PmRLKs167	receptor kinases	990	108724	7.71	35.47	100.45	-0.109	Function unknown	leucine Rich Repeat	S	plas
S_transcript/31842	PmRLKs168	receptor kinases	634	69477.6	8	45.08	96.86	-0.123	Signal transduction mechanisms	Inactive receptor kinase	T	plas
S_transcript/16611	PmRLKs169	receptor kinases	985	106806	7.96	32.92	102.25	0.062	Function unknown	leucine Rich Repeat	S	plas
R_transcript/6920	PmRLKs17	receptor kinases	947	103420	8.63	37.97	105.13	0.024	Function unknown	leucine Rich Repeat	S	plas
S_transcript/31872	PmRLKs170	receptor kinases	607	67154.4	5.89	36.45	98.25	-0.191	Signal transduction mechanisms	Serine Threonine protein kinase	T	plas
S_transcript/13547	PmRLKs171	receptor kinases	707	76794.9	6.4	47.92	89.39	-0.257	Function unknown	strubbelig-receptor family	S	plas
S_transcript/8824	PmRLKs172	receptor kinases	678	74201.6	5.7	30.8	106.5	0.068	Function unknown	leucine Rich Repeat	S	nucl
R_transcript/6175	PmRLKs173	receptor kinases	932	102264	6.14	33.12	108.86	0.082	Function unknown	leucine Rich Repeat	S	extr
S_transcript/11801	PmRLKs174	receptor kinases	966	106161	7.14	40.77	110.5	0.087	Function unknown	leucine Rich Repeat	S	chlo
R_transcript/3453	PmRLKs175	receptor kinases	752	84203.1	7.82	53.5	83.62	-0.312	Signal transduction mechanisms	LRR receptor-like serine threonine-protein kinase	T	vacu
R_transcript/12147	PmRLKs176	receptor kinases	635	70358	5.33	38.47	97.67	-0.213	Function unknown	leucine Rich Repeat	S	plas
R_transcript/4704	PmRLKs177	receptor kinases	987	108361	5.97	32.29	98.27	-0.152	Function unknown	leucine Rich Repeat	S	plas
S_transcript/38669	PmRLKs178	receptor kinases	677	73709.7	6.77	37.69	96.09	-0.08	Function unknown	Leucine-rich repeat	S	plas
S_transcript/7540	PmRLKs179	receptor kinases	1066	116372	8.22	40.86	108.35	0.108	Function unknown	leucine Rich Repeat	S	plas
S_transcript/12744	PmRLKs18	receptor kinases	655	72483.5	8.34	34.12	99.6	0.017	Function unknown	leucine Rich Repeat	S	nucl
S_transcript/4611	PmRLKs180	receptor kinases	640	70202.9	7.9	35.49	96.11	-0.071	Signal transduction mechanisms	NSP-interacting kinase	T	plas
S_transcript/13926	PmRLKs181	receptor kinases	907	98946.8	6.39	32.63	106.06	0.058	Function unknown	leucine Rich Repeat	S	vacu
S_transcript/10990	PmRLKs182	receptor kinases	1137	125567	6.48	38.16	110.18	0.007	Function unknown	leucine Rich Repeat	S	extr
S_transcript/5132	PmRLKs183	receptor kinases	723	79261.4	6.56	37.78	110.12	0.076	Function unknown	leucine Rich Repeat	S	chlo
S_transcript/15701	PmRLKs184	receptor kinases	969	104055	6.06	32.67	102.95	0.087	Signal transduction mechanisms	G-type lectin S-receptor-like serine threonine-protein kinase	T	chlo
S_transcript/13706	PmRLKs185	receptor kinases	853	93248.8	7.28	35.41	109.48	0.078	Function unknown	leucine Rich Repeat	S	plas
S_transcript/21051	PmRLKs19	receptor kinases	956	106465	8.9	42.76	94.09	-0.103	Signal transduction mechanisms	Serine Threonine protein kinase	T	plas
R_transcript/8974	PmRLKs2	receptor kinases	631	70066.4	6.32	37.79	100.57	-0.087	Signal transduction mechanisms	Serine Threonine protein kinase	T	plas
S_transcript/11041	PmRLKs20	receptor kinases	794	87686.4	8.18	46.3	94.56	-0.133	Signal transduction mechanisms	Serine Threonine protein kinase	T	plas
R_transcript/507	PmRLKs21	receptor kinases	1203	134406	5.44	51.17	86.42	-0.419	Function unknown	leucine Rich Repeat	S	nucl
S_transcript/45975	PmRLKs22	receptor kinases	643	71201.9	7.94	34.42	96.73	-0.095	Signal transduction mechanisms	NSP-interacting kinase	T	cyto
S_transcript/508	PmRLKs23	receptor kinases	1128	122184	6.73	38.28	98.97	-0.068	Function unknown	leucine Rich Repeat	S	plas
S_transcript/13595	PmRLKs24	receptor kinases	724	78747.9	7.93	41.64	106.52	0.02	Function unknown	leucine Rich Repeat	S	vacu
R_transcript/5964	PmRLKs25	receptor kinases	1045	115480	7.56	39.08	102.61	0.024	Function unknown	leucine Rich Repeat	S	plas
R_transcript/7362	PmRLKs26	receptor kinases	956	105342	5.83	34.33	96.08	-0.16	Signal transduction mechanisms	Serine Threonine protein kinase	T	plas
R_transcript/5545	PmRLKs27	receptor kinases	1051	115211	8.18	32.01	104.04	0.021	Function unknown	leucine Rich Repeat	S	plas
S_transcript/27060	PmRLKs28	receptor kinases	931	104451	8.33	39.51	98.3	-0.169	Signal transduction mechanisms	Serine Threonine protein kinase	T	plas
S_transcript/4690	PmRLKs29	receptor kinases	1182	129935	7.89	39.46	94.42	-0.116	Function unknown	leucine Rich Repeat	S	plas
S_transcript/11792	PmRLKs3	receptor kinases	1081	119003	8.57	35.71	101.51	0.028	Function unknown	leucine Rich Repeat	S	plas
R_transcript/9375	PmRLKs30	receptor kinases	923	102828	6.24	38.49	93.56	-0.169	Signal transduction mechanisms	Serine Threonine protein kinase	T	vacu
S_transcript/11883	PmRLKs31	receptor kinases	998	111321	6.36	29.45	94.85	-0.194	Function unknown	leucine Rich Repeat	S	plas
S_transcript/6133	PmRLKs32	receptor kinases	1155	125795	6.34	37.08	112.11	0.104	Function unknown	leucine Rich Repeat	S	extr
S_transcript/4414	PmRLKs33	receptor kinases	535	58062.5	6.5	35.99	95.83	-0.021	Function unknown	leucine Rich Repeat	S	plas
R_transcript/2199	PmRLKs34	receptor kinases	1130	123555	6.91	36.03	101.33	-0.027	Function unknown	leucine Rich Repeat	S	vacu
S_transcript/10101	PmRLKs35	receptor kinases	1048	115823	8.56	39.36	110.11	0.045	Function unknown	leucine Rich Repeat	S	plas
S_transcript/6761	PmRLKs36	receptor kinases	1150	125073	6.45	41.81	109.28	0.057	Function unknown	leucine Rich Repeat	S	plas
S_transcript/5131	PmRLKs37	receptor kinases	1071	118758	8.75	38.16	101.81	0.045	Function unknown	leucine Rich Repeat	S	plas
R_transcript/5853	PmRLKs38	receptor kinases	1063	116893	8.27	32.53	107.1	0.071	Function unknown	leucine Rich Repeat	S	plas
R_transcript/4895	PmRLKs39	receptor kinases	1003	108964	7.08	38.06	105.12	0.072	Function unknown	leucine Rich Repeat	S	plas
S_transcript/3607	PmRLKs4	receptor kinases	1094	120296	6.35	37.77	112.55	0.115	Function unknown	leucine Rich Repeat	S	chlo
R_transcript/4725	PmRLKs40	receptor kinases	1106	121376	6.4	36.66	112.89	0.112	Function unknown	leucine Rich Repeat	S	plas
S_transcript/22398	PmRLKs41	receptor kinases	630	69732.7	5.76	42.5	95.92	-0.174	Signal transduction mechanisms	Somatic embryogenesis receptor kinase	T	chlo
S_transcript/15276	PmRLKs42	receptor kinases	942	105436	5.7	33.72	89.33	-0.308	Signal transduction mechanisms	Serine Threonine protein kinase	T	plas
S_transcript/5482	PmRLKs43	receptor kinases	1012	111062	5.91	36.41	105.22	-0.007	Function unknown	leucine Rich Repeat	S	extr
S_transcript/12563	PmRLKs44	receptor kinases	1067	116959	8.45	42.15	108.55	0.112	Function unknown	leucine Rich Repeat	S	plas
S_transcript/17766	PmRLKs45	receptor kinases	942	105500	7.27	37.64	98.28	-0.141	Signal transduction mechanisms	Serine Threonine protein kinase	T	plas
S_transcript/13015	PmRLKs46	receptor kinases	639	70363.6	7	41.05	107.09	0.064	Function unknown	leucine Rich Repeat	S	nucl
S_transcript/10577	PmRLKs47	receptor kinases	948	104124	8.37	31.61	104.08	0.007	Function unknown	leucine Rich Repeat	S	vacu
R_transcript/8007	PmRLKs48	receptor kinases	872	97207.6	6.09	30.76	88.91	-0.236	Signal transduction mechanisms	Serine Threonine protein kinase	T	plas
S_transcript/8931	PmRLKs49	receptor kinases	914	98458.2	6.49	31.23	94.91	-0.096	Signal transduction mechanisms	receptor protein kinase	T	vacu
S_transcript/11348	PmRLKs5	receptor kinases	1011	111688	8.58	33.4	111	0.145	Function unknown	leucine Rich Repeat	S	plas
S_transcript/18669	PmRLKs50	receptor kinases	810	88669.9	7.54	34.72	110.73	0.126	Function unknown	leucine Rich Repeat	S	chlo
S_transcript/1284	PmRLKs51	receptor kinases	1451	158283	5.92	37.33	109.78	0.026	Function unknown	leucine Rich Repeat	S	plas
S_transcript/12257	PmRLKs52	receptor kinases	1054	115642	8.56	28.49	103.57	0.015	Function unknown	leucine Rich Repeat	S	plas
S_transcript/13944	PmRLKs53	receptor kinases	880	96436.4	6.84	36.94	108.98	0.13	Function unknown	leucine Rich Repeat	S	nucl
S_transcript/2800	PmRLKs54	receptor kinases	1354	148572	6.55	38.6	110.46	-0.04	Function unknown	leucine Rich Repeat	S	plas
S_transcript/7891	PmRLKs55	receptor kinases	1003	110074	8.2	29.3	95.39	-0.043	Function unknown	leucine Rich Repeat	S	vacu
S_transcript/20163	PmRLKs56	receptor kinases	905	100112	6.04	37.42	95.76	-0.144	Signal transduction mechanisms	Serine Threonine protein kinase	T	plas
S_transcript/17020	PmRLKs57	receptor kinases	476	52317.9	8.56	34.83	95.67	-0.148	Signal transduction mechanisms	Serine Threonine protein kinase	T	plas
R_transcript/5803	PmRLKs58	receptor kinases	1062	116601	8.4	35.48	103.32	0.075	Function unknown	leucine Rich Repeat	S	plas
R_transcript/1239	PmRLKs59	receptor kinases	815	90041.7	6.87	38.36	102.63	-0.039	Function unknown	leucine Rich Repeat	S	chlo
S_transcript/3226	PmRLKs6	receptor kinases	654	72473	5.84	35.53	99.71	-0.128	Function unknown	leucine Rich Repeat	S	chlo
S_transcript/6047	PmRLKs60	receptor kinases	1073	116857	6.42	36.61	100.71	-0.077	Signal transduction mechanisms	Serine Threonine protein kinase	T	vacu
S_transcript/11868	PmRLKs61	receptor kinases	1092	119535	7.13	42.1	108.82	0.116	Function unknown	leucine Rich Repeat	S	plas
R_transcript/7063	PmRLKs62	receptor kinases	954	106098	6.96	34.9	96.3	-0.16	Signal transduction mechanisms	Serine Threonine protein kinase	T	nucl
R_transcript/7288	PmRLKs63	receptor kinases	1024	113479	8.87	39.25	110.61	0.037	Function unknown	leucine Rich Repeat	S	plas
R_transcript/3633	PmRLKs64	receptor kinases	942	100324	5.55	37.75	87.78	-0.04	Signal transduction mechanisms	receptor protein kinase	T	chlo
S_transcript/17269	PmRLKs65	receptor kinases	975	105704	5.21	36.99	93.79	-0.1	Signal transduction mechanisms	Serine Threonine protein kinase	T	extr
S_transcript/15243	PmRLKs66	receptor kinases	831	91918	8.3	37.62	104.98	-0.031	Signal transduction mechanisms	inactive leucine-rich repeat receptor-like protein kinase	T	plas
S_transcript/13795	PmRLKs67	receptor kinases	943	104113	5.85	36.33	98.64	-0.141	Signal transduction mechanisms	Serine Threonine protein kinase	T	plas
R_transcript/16556	PmRLKs68	receptor kinases	660	74705.6	5.95	40.31	91.42	-0.19	Signal transduction mechanisms	Serine Threonine protein kinase	T	plas
S_transcript/13999	PmRLKs69	receptor kinases	961	105276	5.78	36	103.9	0.008	Function unknown	leucine Rich Repeat	S	plas
S_transcript/30343	PmRLKs7	receptor kinases	635	70067.5	6.53	46.11	101.65	-0.103	Signal transduction mechanisms	Leucine-rich repeat receptor-like protein kinase	T	plas
S_transcript/6939	PmRLKs70	receptor kinases	1088	119951	8.17	43.18	103.55	0.047	Function unknown	leucine Rich Repeat	S	plas
S_transcript/21048	PmRLKs71	receptor kinases	957	104648	6.17	40.03	110.83	0.143	Signal transduction mechanisms	Serine Threonine protein kinase	T	plas
R_transcript/5789	PmRLKs72	receptor kinases	1010	111162	6.5	36.82	115.27	0.102	Function unknown	leucine Rich Repeat	S	nucl
R_transcript/4455	PmRLKs73	receptor kinases	1012	111334	6.11	30.24	97.62	-0.177	Function unknown	leucine Rich Repeat	S	E.R.
S_transcript/9073	PmRLKs74	receptor kinases	739	80660	6.15	41.47	97.09	-0.139	Signal transduction mechanisms	Serine Threonine protein kinase	T	plas
S_transcript/25089	PmRLKs75	receptor kinases	650	71327.2	8.75	44.88	95.78	-0.095	Function unknown	inactive receptor kinase	S	plas
R_transcript/4213	PmRLKs76	receptor kinases	1082	118884	6.12	37.22	115.51	0.067	Function unknown	leucine Rich Repeat	S	cyto
S_transcript/7477	PmRLKs77	receptor kinases	998	109284	5.9	36.51	102.67	-0.047	Function unknown	leucine Rich Repeat	S	vacu
S_transcript/42547	PmRLKs78	receptor kinases	579	65143.4	5.73	39.16	93.96	-0.182	Signal transduction mechanisms	Serine Threonine protein kinase	T	nucl
S_transcript/2754	PmRLKs79	receptor kinases	1254	136587	6.03	39.76	106.92	0.003	Function unknown	leucine Rich Repeat	S	plas
R_transcript/8733	PmRLKs8	receptor kinases	940	104387	6.52	30.5	94.9	-0.103	Signal transduction mechanisms	Serine Threonine protein kinase	T	plas
S_transcript/5083	PmRLKs80	receptor kinases	1222	133887	5.86	36.51	107.18	0.016	Function unknown	leucine Rich Repeat	S	nucl
S_transcript/5236	PmRLKs81	receptor kinases	984	107693	7.45	32.88	102.95	-0.095	Function unknown	leucine Rich Repeat	S	plas
S_transcript/2745	PmRLKs82	receptor kinases	1153	128980	5.38	51.17	86.53	-0.424	Function unknown	leucine Rich Repeat	S	nucl
S_transcript/2671	PmRLKs83	receptor kinases	1241	135323	5.71	38.29	96.44	-0.07	Function unknown	leucine Rich Repeat	S	plas
R_transcript/6458	PmRLKs84	receptor kinases	518	57115.5	6.37	30.07	95.04	-0.057	Function unknown	leucine Rich Repeat	S	chlo
S_transcript/7288	PmRLKs85	receptor kinases	992	108282	6	31.9	103.79	0.096	Function unknown	leucine Rich Repeat	S	vacu
S_transcript/12132	PmRLKs86	receptor kinases	949	105636	6.11	38.49	94.39	-0.135	Signal transduction mechanisms	Serine Threonine protein kinase	T	plas
S_transcript/5399	PmRLKs87	receptor kinases	1133	125393	6.65	45.03	105.74	-0.105	Function unknown	leucine Rich Repeat	S	plas
S_transcript/1983	PmRLKs88	receptor kinases	1000	106521	5.96	39.91	90.2	-0.126	Signal transduction mechanisms	receptor protein kinase	T	plas
S_transcript/7052	PmRLKs89	receptor kinases	1148	125092	8.1	41.02	103.63	-0.051	Function unknown	leucine Rich Repeat	S	plas
R_transcript/5396	PmRLKs9	receptor kinases	940	103213	8.14	32.3	113.67	0.127	Function unknown	leucine Rich Repeat	S	plas
S_transcript/17321	PmRLKs90	receptor kinases	996	111018	6.63	38.06	95.75	-0.108	Signal transduction mechanisms	Serine Threonine protein kinase	T	plas
S_transcript/4012	PmRLKs91	receptor kinases	1116	121548	8.44	35.83	111.65	0.048	Function unknown	leucine Rich Repeat	S	plas
R_transcript/21723	PmRLKs92	receptor kinases	654	72862.4	5.95	36.21	98.64	-0.065	Signal transduction mechanisms	Serine Threonine protein kinase	T	plas
S_transcript/9270	PmRLKs93	receptor kinases	992	109178	6.26	31.42	98.81	-0.13	Function unknown	leucine Rich Repeat	S	plas
S_transcript/24792	PmRLKs94	receptor kinases	921	103109	5.9	41.65	92.7	-0.151	Signal transduction mechanisms	Serine Threonine protein kinase	T	plas
R_transcript/2933	PmRLKs95	receptor kinases	1045	116423	6.74	36.28	96.98	-0.151	Signal transduction mechanisms	(E 0.0) leucine-rich repeat family protein protein kinase family protein	T	nucl
S_transcript/13088	PmRLKs96	receptor kinases	727	78822	6.64	46.5	87.76	-0.245	Signal transduction mechanisms	Serine Threonine protein kinase	T	plas
S_transcript/5918	PmRLKs97	receptor kinases	963	107116	6.27	49.12	93.22	-0.11	Signal transduction mechanisms	Serine Threonine protein kinase	T	chlo
S_transcript/18466	PmRLKs98	receptor kinases	931	103341	6.33	39.39	98.42	-0.099	Signal transduction mechanisms	Serine Threonine protein kinase	T	plas
R_transcript/3892	PmRLKs99	receptor kinases	984	108109	6.21	31.45	102.61	-0.047	Function unknown	leucine Rich Repeat	S	plas

## Sheet: Sheet1
Atrophin-1 family	Atrophin-1 family ;Atrophin-1 is the protein product of the dentatorubral-pallidoluysian atrophy (DRPLA) gene. DRPLA OMIM:125370 is a progressive neurodegenerative disorder. It is caused by the expansion of a CAG repeat in the DRPLA gene on chromosome 12p. This results in an extended polyglutamine region in atrophin-1, that is thought to confer toxicity to the protein, possibly through altering i…
LRRNT-2	Leucine rich repeat N-terminal domain
LRR-8
Pkinase_Tyr
Malectin-like	Carbohydrate-binding protein of the ER ;Malectin is a membrane-anchored protein of the endoplasmic reticulum that recognizes and binds Glc2-N-glycan. The domain is found on a number of plant receptor kinases.
LRRNT-2	LRR-8			lrr ii
LRRNT-2	LRR-8	Pkinase_Tyr		pkc
Atrophin-1 family	LRR-8			at
Malectin-like	LRR-8
